# Supplementary material for: Flame retardant polyphosphoester copolymers as solid polymer electrolyte for lithium batteries
Source: Royal Society of Chemistry journal article supplement (doi:10.1039/d1py00344e), 2021-01-01
Supplement: d1py00344e1.pdf [file d1py00344e1.pdf]

## Supplementary information

### Flame Retardant Polyphosphoester Copolymers as Solid Polymer Electrolyte for Lithium Batteries

Jorge L. Olmedo-Martínez<sup>a</sup>, Leire Meabe<sup>b</sup>, Raphaël Riva<sup>c</sup>, Gregorio Guzmán-González<sup>a</sup>, Luca Porcarelli<sup>a,e</sup>, Maria Forsyth<sup>a,d,e</sup>, Agurtzane Mugica<sup>a</sup>, Itxaso Calafel<sup>a</sup>, Alejandro J. Müller<sup>a,d</sup>, Philippe Lecomte<sup>c</sup>, Christine Jérôme<sup>c</sup>, David Mecerreyes<sup>a,d</sup> \*

<sup>a</sup>POLYMAT and Dpto. Polímeros y Materiales Avanzados: Física, Química y Tecnología, Faculty of Chemistry, University of the Basque Country UPV/EHU, Paseo Manuel de Lardizábal 3, 20018 Donostia-San Sebastián, Spain.

<sup>b</sup>Centre for Cooperative Research on Alternative Energies (CIC energiGUNE), Basque Research and Technology Alliance (BRTA), 01510 Vitoria-Gasteiz, Spain.

<sup>c</sup>Centre for Education and Research on Macromolecules (CERM), CESAM Research Unit, University of Liege (ULiège), Building B6a, 4000 Liège, Belgium.

<sup>d</sup>IKERBASQUE, Basque Foundation for Science, 48011 Bilbao, Spain.

<sup>e</sup>ARC Centre of Excellence for Electromaterials Science and Institute for Frontier Materials, Deakin University, Melbourne 3125, Australia.

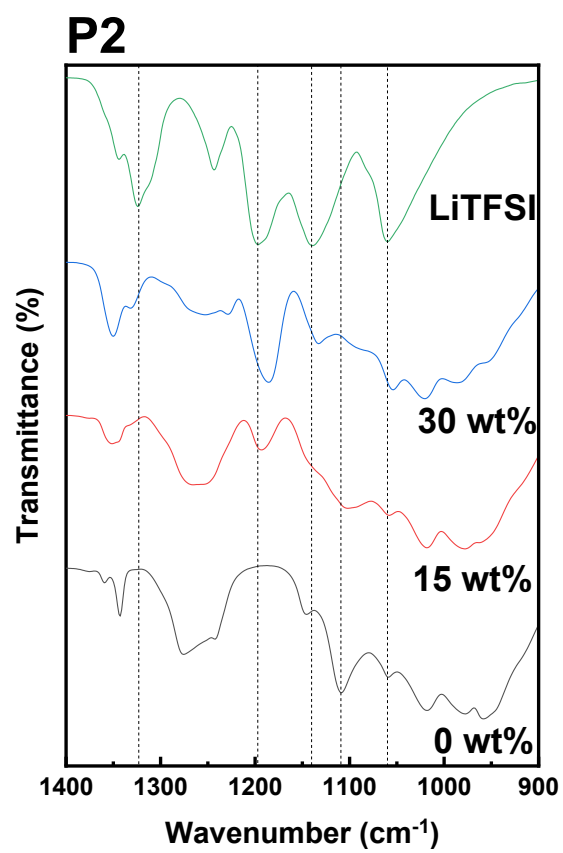

**Figure S1.** FTIR of P2 with LiTFSI

**Thermal Gravimetric Analysis (TGA):** The TGA analysis were carried out in inert atmosphere (N<sub>2</sub>), from 30 °C to 800 °C at 10 °C/min.

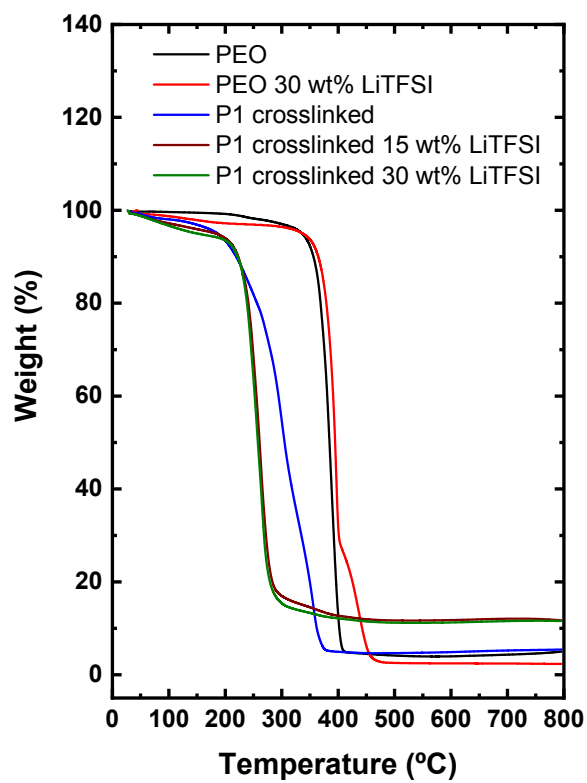

**Figure S2.** TGA of the diferent polymers

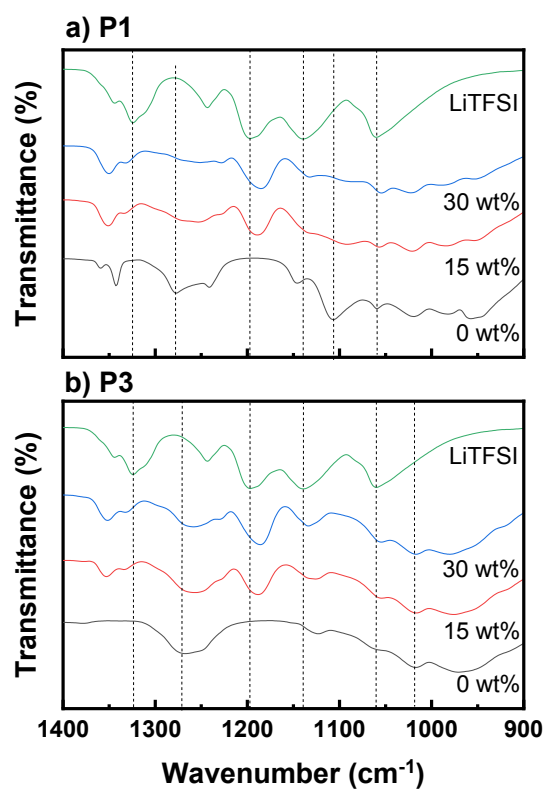

**Figure S3.** FTIR spectra of P1 and P3 with different amount of LiTFSI.
